# Supplementary material
Source: publisher figshare collection journal article supplement (https://sage.figshare.com/ndownloader/files/20028524)
Supplement: Supplementary file 1 [file 20028524]

**Appendix**  
**Table S1: Search Strategies by Database**

| PubMed<br>(searched 4/30/19)                                                                                                                                                                                                                                                                                                                                                                                                                                                                                                                                                                                                                            | Cochrane Library<br>(Wiley; searched 4/30/19)                                                                                                                                                                                                                                                                                                                                                                                                                                                                                                                                                                                                                                                                                                                                                                                                                                                                                                                                                                                                                                                                                                                                                                                                                                                                                                                                                                                                                                                                                                                                                                                                                                                                                                                                                                 | CINAHL Complete<br>(EBSCO; searched 4/30/19)                                                                                                                                                                                                                                                                                                                                                                                                                                                                            | Web of Knowledge<br>(Clarivate Analytics;<br>All Databases;<br>searched 4/30/19)                                                                                                                                                                                                                                                                                                                                                                                                                                                                                                                                                                                                                                        | ClinicalTrials.gov<br>(searched 4/30/19)                                                                                                                                                 | PEDro<br>(searched 4/30/19)                                                                               |
|---------------------------------------------------------------------------------------------------------------------------------------------------------------------------------------------------------------------------------------------------------------------------------------------------------------------------------------------------------------------------------------------------------------------------------------------------------------------------------------------------------------------------------------------------------------------------------------------------------------------------------------------------------|---------------------------------------------------------------------------------------------------------------------------------------------------------------------------------------------------------------------------------------------------------------------------------------------------------------------------------------------------------------------------------------------------------------------------------------------------------------------------------------------------------------------------------------------------------------------------------------------------------------------------------------------------------------------------------------------------------------------------------------------------------------------------------------------------------------------------------------------------------------------------------------------------------------------------------------------------------------------------------------------------------------------------------------------------------------------------------------------------------------------------------------------------------------------------------------------------------------------------------------------------------------------------------------------------------------------------------------------------------------------------------------------------------------------------------------------------------------------------------------------------------------------------------------------------------------------------------------------------------------------------------------------------------------------------------------------------------------------------------------------------------------------------------------------------------------|-------------------------------------------------------------------------------------------------------------------------------------------------------------------------------------------------------------------------------------------------------------------------------------------------------------------------------------------------------------------------------------------------------------------------------------------------------------------------------------------------------------------------|-------------------------------------------------------------------------------------------------------------------------------------------------------------------------------------------------------------------------------------------------------------------------------------------------------------------------------------------------------------------------------------------------------------------------------------------------------------------------------------------------------------------------------------------------------------------------------------------------------------------------------------------------------------------------------------------------------------------------|------------------------------------------------------------------------------------------------------------------------------------------------------------------------------------------|-----------------------------------------------------------------------------------------------------------|
| 1. "Autistic Disorder"[Mesh]<br>2. "Autism Spectrum Disorder"[Mesh]<br>3. autism<br>4. autistic<br>5. 1-4/OR<br>6. "Postural Balance"[Mesh]<br>7. "Physical Fitness"[Mesh]<br>8. "Athletic Performance"[Mesh]<br>9. "Physical Endurance"[Mesh]<br>10. "Baseball"[Mesh]<br>11. "Basketball"[Mesh]<br>12. "Bicycling"[Mesh]<br>13. "Boxing"[Mesh]<br>14. "Football"[Mesh]<br>15. "Golf"[Mesh]<br>16. "Gymnastics"[Mesh]<br>17. "Hockey"[Mesh]<br>18. "Martial Arts"[Mesh]<br>19. "Tai Ji"[Mesh]<br>20. "Mountaineering"[Mesh]<br>21. "Racquet Sports"[Mesh]<br>22. "Tennis"[Mesh]<br>23. "Skating"[Mesh]<br>24. "Snow Sports"[Mesh]<br>25. "Skiing"[Mesh] | 1. MeSH descriptor: [Autistic Disorder] explode all trees<br>2. MeSH descriptor: [Autism Spectrum Disorder] explode all trees<br>3. autism:ti,ab,kw (Word variations have been searched)<br>4. autistic:ti,ab,kw (Word variations have been searched)<br>5. <b>1-4/OR</b><br>6. MeSH descriptor: [Postural Balance] explode all trees<br>7. MeSH descriptor: [Physical Fitness] explode all trees<br>8. MeSH descriptor: [Athletic Performance] explode all trees<br>9. MeSH descriptor: [Physical Endurance] explode all trees<br>10. MeSH descriptor: [Baseball] explode all trees<br>11. MeSH descriptor: [Basketball] explode all trees<br>12. MeSH descriptor: [Bicycling] explode all trees<br>13. MeSH descriptor: [Boxing] explode all trees<br>14. MeSH descriptor: [Football] explode all trees<br>15. MeSH descriptor: [Golf] explode all trees<br>16. MeSH descriptor: [Gymnastics] explode all trees<br>17. MeSH descriptor: [Hockey] explode all trees<br>18. MeSH descriptor: [Tai Ji] explode all trees<br>19. MeSH descriptor: [Mountaineering] explode all trees<br>20. MeSH descriptor: [Racquet Sports] explode all trees<br>21. MeSH descriptor: [Tennis] explode all trees<br>22. MeSH descriptor: [Skating] explode all trees<br>23. MeSH descriptor: [Snow Sports] explode all trees<br>24. MeSH descriptor: [Skiing] explode all trees<br>25. MeSH descriptor: [Soccer] explode all trees<br>26. MeSH descriptor: [Sports for Persons with Disabilities] explode all trees<br>27. MeSH descriptor: [Track and Field] explode all trees<br>28. MeSH descriptor: [Youth Sports] explode all trees<br>29. MeSH descriptor: [Wrestling] explode all trees<br>30. MeSH descriptor: [Weight Lifting] explode all trees<br>31. MeSH descriptor: [Equine-Assisted Therapy] explode all trees | 1. boy*<br>2. Girl*<br>3. Toddler*<br>4. Perinatology<br>5. Neonatology<br>6. Pediatric<br>7. Pediatrics<br>8. Minor*<br>9. Youth*<br>10. Preteens<br>11. Preteen<br>12. Prepubescence<br>13. Prepubescent*<br>14. pubertal<br>15. Preadolescence<br>16. Preadolescent*<br>17. Teenager*<br>18. teen*<br>19. Adolescence<br>20. Adolescent*<br>21. Childhood<br>22. Children<br>23. Postpremature<br>24. Premature<br>25. Preterm<br>26. Infancy<br>27. Neonatal<br>28. Natal<br>29. Babies<br>30. Baby<br>31. newborn* | 1. TOPIC: (autistic)<br>2. TOPIC: (autism)<br>3. <b>1-2/OR</b><br>4. TOPIC: (jogging)<br>5. TOPIC: (treadmill)<br>6. TOPIC: (walking)<br>7. TOPIC: (throwing)<br>8. TOPIC: (dance)<br>9. TOPIC: (skateboarding)<br>10. TOPIC: (exergaming)<br>11. TOPIC: (snowshoeing)<br>12. TOPIC: (trampoline)<br>13. TOPIC: ("horse riding")<br>14. TOPIC: (hippotherapy)<br>15. TOPIC: ("aquatic exercise")<br>16. TOPIC: (swimming)<br>17. TOPIC: (agility)<br>18. TOPIC: (running)<br>19. TOPIC: ("aerobic training")<br>20. TOPIC: ("strength training")<br>21. TOPIC: (coordination)<br>22. TOPIC: ("balance training")<br>23. TOPIC: ("weight bearing exercise")<br>24. TOPIC: (exercise)<br>25. TOPIC: ("physical activity") | (Autism Spectrum Disorder [DISEASE] OR autism OR autistic) <b>AND</b> (motor skills OR "motor intervention" OR coordination OR balance) <b>AND</b> (child OR youth OR teen OR pediatric) | 1. Autis* AND activ*<br>2. Autis* AND motor<br>3. Autis* AND exercise<br>4. Autis* AND "physical therapy" |

**Appendix**  
**Table S1: Search Strategies by Database**

| <b>PubMed<br/>(searched 4/30/19)</b>                                                                                                                                                                                                                                                                                                                                                                                                                                                                                                                                                                                                                                                                                                                                   | <b>Cochrane Library<br/>(Wiley; searched 4/30/19)</b>                                                                                                                                                                                                                                                                                                                                                                                                                                                                                                                                                                                                                                                                                                                                                                                                                                                                                                                                                                                                                                                                                                                                                                                                                                                                                                                                               | <b>CINAHL Complete<br/>(EBSCO; searched 4/30/19)</b>                                                                                                                                                                                                                                                                                                                                                                                                                                                    | <b>Web of Knowledge<br/>(Clarivate Analytics;<br/>All Databases;<br/>searched 4/30/19)</b>                                                                                                                                                                                                                                                                                                                                                                                                                                                                                                                                                                                                                                                                                                    | <b>ClinicalTrials.gov<br/>(searched 4/30/19)</b> | <b>PEDro<br/>(searched 4/30/19)</b> |
|------------------------------------------------------------------------------------------------------------------------------------------------------------------------------------------------------------------------------------------------------------------------------------------------------------------------------------------------------------------------------------------------------------------------------------------------------------------------------------------------------------------------------------------------------------------------------------------------------------------------------------------------------------------------------------------------------------------------------------------------------------------------|-----------------------------------------------------------------------------------------------------------------------------------------------------------------------------------------------------------------------------------------------------------------------------------------------------------------------------------------------------------------------------------------------------------------------------------------------------------------------------------------------------------------------------------------------------------------------------------------------------------------------------------------------------------------------------------------------------------------------------------------------------------------------------------------------------------------------------------------------------------------------------------------------------------------------------------------------------------------------------------------------------------------------------------------------------------------------------------------------------------------------------------------------------------------------------------------------------------------------------------------------------------------------------------------------------------------------------------------------------------------------------------------------------|---------------------------------------------------------------------------------------------------------------------------------------------------------------------------------------------------------------------------------------------------------------------------------------------------------------------------------------------------------------------------------------------------------------------------------------------------------------------------------------------------------|-----------------------------------------------------------------------------------------------------------------------------------------------------------------------------------------------------------------------------------------------------------------------------------------------------------------------------------------------------------------------------------------------------------------------------------------------------------------------------------------------------------------------------------------------------------------------------------------------------------------------------------------------------------------------------------------------------------------------------------------------------------------------------------------------|--------------------------------------------------|-------------------------------------|
| 26. "Soccer"[Mesh]<br>27. "Sports for Persons with Disabilities"[Mesh]<br>28. "Track and Field"[Mesh]<br>29. "Youth Sports"[Mesh]<br>30. "Wrestling"[Mesh]<br>31. "Weight Lifting"[Mesh]<br>32. "Equine-Assisted Therapy"[Mesh]<br>33. "Hydrotherapy"[Mesh]<br>34. "Games, Recreational"[Mesh]<br>35. "Motor Skills"[Mesh]<br>36. "motor intervention"<br>37. "Physical Therapy Modalities"[Mesh]<br>38. "Physical Therapists"[Mesh]<br>39. "physical therapy"<br>40. "Braces"[Mesh]<br>41. "Foot Orthoses"[Mesh]<br>42. "motor learning"<br>43. "motor skill acquisition"<br>44. "behavior skills training"<br>45. "task specific training"<br>46. "physical activity"<br>47. exercise<br>48. "weight bearing exercise"<br>49. "balance training"<br>50. coordination | 32. MeSH descriptor: [Hydrotherapy] explode all trees<br>33. MeSH descriptor: [Games, Recreational] explode all trees<br>34. MeSH descriptor: [Motor Skills] explode all trees<br>35. motor intervention:ti,ab,kw (Word variations have been searched)<br>36. MeSH descriptor: [Physical Therapy Modalities] explode all trees<br>37. MeSH descriptor: [Physical Therapists] explode all trees<br>38. physical therapy:ti,ab,kw (Word variations have been searched)<br>39. MeSH descriptor: [Braces] explode all trees<br>40. MeSH descriptor: [Foot Orthoses] explode all trees<br>41. motor learning:ti,ab,kw (Word variations have been searched)<br>42. motor skill acquisition:ti,ab,kw (Word variations have been searched)<br>43. behavior skills training:ti,ab,kw (Word variations have been searched)<br>44. task specific training:ti,ab,kw (Word variations have been searched)<br>45. physical activity:ti,ab,kw (Word variations have been searched)<br>46. exercise:ti,ab,kw (Word variations have been searched)<br>47. weight bearing exercise:ti,ab,kw (Word variations have been searched)<br>48. balance training:ti,ab,kw (Word variations have been searched)<br>49. coordination:ti,ab,kw (Word variations have been searched)<br>50. strength training:ti,ab,kw (Word variations have been searched)<br>51. aerobic training:ti,ab,kw (Word variations have been searched) | 32. child*<br>33. Infant<br>34. (MH "Intensive Care Units, Pediatric+")<br>35. (MH "Intensive Care Units, Neonatal")<br>36. (MH "Hospitals, Pediatric")<br>37. (MH "Pediatrics+")<br>38. (MH "Minors (Legal)")<br>39. (MH "Adolescence+")<br>40. (MH "Child+")<br>41. (MH "Infant+")<br>42. <b>1-41/OR</b><br>43. jogging<br>44. treadmill<br>45. walking<br>46. throwing<br>47. dance<br>48. skateboarding<br>49. exergaming<br>50. skating<br>51. snowshoeing<br>52. trampoline<br>53. "horse riding" | 26. TOPIC: ("task specific training")<br>27. TOPIC: ("behavior skills training")<br>28. TOPIC: ("motor skill acquisition")<br>29. TOPIC: ("motor learning")<br>30. TOPIC: ("Foot Orthoses")<br>31. TOPIC: ("Physical Therapists")<br>32. TOPIC: ("physical therapy")<br>33. TOPIC: ("motor intervention")<br>34. TOPIC: ("Motor Skills")<br>35. TOPIC: (Hydrotherapy)<br>36. TOPIC: ("Equine-Assisted Therapy")<br>37. TOPIC: ("Weight Lifting")<br>38. TOPIC: (Wrestling)<br>39. TOPIC: ("Youth Sports")<br>40. TOPIC: ("Track and Field")<br>41. TOPIC: ("Sports for Persons with Disabilities")<br>42. TOPIC: (Soccer)<br>43. TOPIC: (Skiing)<br>44. TOPIC: ("Snow Sports")<br>45. TOPIC: (Skating)<br>46. TOPIC: (Tennis)<br>47. TOPIC: ("Racquet Sports")<br>48. TOPIC: (Mountaineering) |                                                  |                                     |

**Appendix**  
**Table S1: Search Strategies by Database**

| PubMed<br>(searched 4/30/19)                                                                                                                                                                                                                                                                                                                                                                                                                                                                                                                                                                                        | Cochrane Library<br>(Wiley; searched 4/30/19)                                                                                                                                                                                                                                                                                                                                                                                                                                                                                                                                                                                                                                                                                                                                                                                                                                                                                                                                                                                                                                                                                                                                                                          | CINAHL Complete<br>(EBSCO; searched 4/30/19)                                                                                                                                                                                                                                                                                                                                                                                                                                                                | Web of Knowledge<br>(Clarivate Analytics;<br>All Databases;<br>searched 4/30/19)                                                                                                                                                                                                                                                                                                                                                                                                                                                                                                                                                                                                                                                              | ClinicalTrials.gov<br>(searched 4/30/19) | PEDro<br>(searched 4/30/19) |
|---------------------------------------------------------------------------------------------------------------------------------------------------------------------------------------------------------------------------------------------------------------------------------------------------------------------------------------------------------------------------------------------------------------------------------------------------------------------------------------------------------------------------------------------------------------------------------------------------------------------|------------------------------------------------------------------------------------------------------------------------------------------------------------------------------------------------------------------------------------------------------------------------------------------------------------------------------------------------------------------------------------------------------------------------------------------------------------------------------------------------------------------------------------------------------------------------------------------------------------------------------------------------------------------------------------------------------------------------------------------------------------------------------------------------------------------------------------------------------------------------------------------------------------------------------------------------------------------------------------------------------------------------------------------------------------------------------------------------------------------------------------------------------------------------------------------------------------------------|-------------------------------------------------------------------------------------------------------------------------------------------------------------------------------------------------------------------------------------------------------------------------------------------------------------------------------------------------------------------------------------------------------------------------------------------------------------------------------------------------------------|-----------------------------------------------------------------------------------------------------------------------------------------------------------------------------------------------------------------------------------------------------------------------------------------------------------------------------------------------------------------------------------------------------------------------------------------------------------------------------------------------------------------------------------------------------------------------------------------------------------------------------------------------------------------------------------------------------------------------------------------------|------------------------------------------|-----------------------------|
| 51. "strength training"<br>52. "aerobic training"<br>53. running<br>54. agility<br>55. swimming<br>56. aquatic exercise<br>57. hydrotherapy<br>58. hippotherapy<br>59. "equine assisted therapy"<br>60. "horse riding"<br>61. trampoline<br>62. snowshoeing<br>63. skating<br>64. exergaming<br>65. skateboarding<br>66. dance<br>67. throwing<br>68. walking<br>69. treadmill<br>70. jogging<br>71. 6-70/OR<br>72. "Infant"[Mesh]<br>73. "Child"[Mesh]<br>74. "Adolescent"[Mesh]<br>75. "Minors"[Mesh]<br>76. "Pediatrics"[Mesh]<br>77. "Hospitals, Pediatric"[Mesh]<br>78. "Intensive Care Units, Neonatal"[MeSH] | 52. running:ti,ab,kw (Word variations have been searched)<br>53. agility:ti,ab,kw (Word variations have been searched)<br>54. swimming:ti,ab,kw (Word variations have been searched)<br>55. aquatic exercise:ti,ab,kw (Word variations have been searched)<br>56. hydrotherapy:ti,ab,kw (Word variations have been searched)<br>57. hippotherapy:ti,ab,kw (Word variations have been searched)<br>58. equine assisted therapy:ti,ab,kw (Word variations have been searched)<br>59. horse riding:ti,ab,kw (Word variations have been searched)<br>60. trampoline:ti,ab,kw (Word variations have been searched)<br>61. snowshoeing:ti,ab,kw (Word variations have been searched)<br>62. skating:ti,ab,kw (Word variations have been searched)<br>63. exergaming:ti,ab,kw (Word variations have been searched)<br>64. skateboarding:ti,ab,kw (Word variations have been searched)<br>65. dance:ti,ab,kw (Word variations have been searched)<br>66. throwing:ti,ab,kw (Word variations have been searched)<br>67. walking:ti,ab,kw (Word variations have been searched)<br>68. treadmill:ti,ab,kw (Word variations have been searched)<br>69. jogging:ti,ab,kw (Word variations have been searched)<br>70. <b>6-69/OR</b> | 54. "equine assisted therapy"<br>55. hippotherapy<br>56. hydrotherapy<br>57. aquatic exercise<br>58. swimming<br>59. agility<br>60. running<br>61. "aerobic training"<br>62. "strength training"<br>63. coordination<br>64. "balance training"<br>65. "weight bearing exercise"<br>66. exercise<br>67. "physical activity"<br>68. "task specific training"<br>69. "behavior skills training"<br>70. "motor skill acquisition"<br>71. "motor learning"<br>72. (MH "Foot Orthoses")<br>73. "physical therapy" | 49. TOPIC: ("Tai Ji")<br>50. TOPIC: ("Martial Arts")<br>51. TOPIC: (Hockey)<br>52. TOPIC: (Gymnastics)<br>53. TOPIC: (Golf)<br>54. TOPIC: (Football)<br>55. TOPIC: (Boxing)<br>56. TOPIC: (Bicycling)<br>57. TOPIC: (Basketball)<br>58. TOPIC: (Baseball)<br>59. TOPIC: ("Physical Endurance")<br>60. TOPIC: ("Athletic Performance")<br>61. TOPIC: ("Physical Fitness")<br>62. TOPIC: ("Postural Balance")<br>63. <b>4-62/OR</b><br>64. TOPIC: (Boy)<br>65. TOPIC: (Girl)<br>66. TOPIC: (Toddler)<br>67. TOPIC: (Perinatology)<br>68. TOPIC: (Neonatology)<br>69. TOPIC: (Pediatric)<br>70. TOPIC: (Minor)<br>71. TOPIC: (Youth)<br>72. TOPIC: (Preteen)<br>73. TOPIC: (Prepubescence)<br>74. TOPIC: (Prepubescent)<br>75. TOPIC: (pubertal) |                                          |                             |

**Appendix**  
**Table S1: Search Strategies by Database**

| PubMed<br>(searched 4/30/19)                                                                                                                                                                                                                                                                                                                                                                                                                                                                                                                                  | Cochrane Library<br>(Wiley; searched 4/30/19)                                                                                                                                                                                                                                                                                                                                                                                                                                                                                                                                                                                                                                                                                                                                                                                                                                                                                                                                                                                                                                                                                                                                                                                                                                                                                                                                      | CINAHL Complete<br>(EBSCO; searched 4/30/19)                                                                                                                                                                                                                                                                                                                                                                                                                     | Web of Knowledge<br>(Clarivate Analytics;<br>All Databases;<br>searched 4/30/19)                                                                                                                                                                                                                                                                                                                                                              | ClinicalTrials.gov<br>(searched 4/30/19) | PEDro<br>(searched 4/30/19) |
|---------------------------------------------------------------------------------------------------------------------------------------------------------------------------------------------------------------------------------------------------------------------------------------------------------------------------------------------------------------------------------------------------------------------------------------------------------------------------------------------------------------------------------------------------------------|------------------------------------------------------------------------------------------------------------------------------------------------------------------------------------------------------------------------------------------------------------------------------------------------------------------------------------------------------------------------------------------------------------------------------------------------------------------------------------------------------------------------------------------------------------------------------------------------------------------------------------------------------------------------------------------------------------------------------------------------------------------------------------------------------------------------------------------------------------------------------------------------------------------------------------------------------------------------------------------------------------------------------------------------------------------------------------------------------------------------------------------------------------------------------------------------------------------------------------------------------------------------------------------------------------------------------------------------------------------------------------|------------------------------------------------------------------------------------------------------------------------------------------------------------------------------------------------------------------------------------------------------------------------------------------------------------------------------------------------------------------------------------------------------------------------------------------------------------------|-----------------------------------------------------------------------------------------------------------------------------------------------------------------------------------------------------------------------------------------------------------------------------------------------------------------------------------------------------------------------------------------------------------------------------------------------|------------------------------------------|-----------------------------|
| 79. "Intensive Care Units,<br>Pediatric"[Mesh]<br>80. Infant<br>81. Infants<br>82. Newborn<br>83. Newborns<br>84. Baby<br>85. Babies<br>86. Natal<br>87. Neonatal<br>88. Infancy<br>89. Preterm<br>90. Premature<br>91. Postpremature<br>92. Child<br>93. Children<br>94. Childhood<br>95. Adolescent<br>96. Adolescents<br>97. Adolescence<br>98. Teen<br>99. Teens<br>100. Teenager<br>101. Teenagers<br>102. Preadolescent<br>103. Preadolescents<br>104. Preadolescence<br>105. pubertal<br>106. Prepubescent<br>107. Prepubescents<br>108. Prepubescence | 71. MeSH descriptor: [Infant] explode all trees<br>72. MeSH descriptor: [Child] explode all trees<br>73. MeSH descriptor: [Adolescent] explode all trees<br>74. MeSH descriptor: [Minors] explode all trees<br>75. MeSH descriptor: [Pediatrics] explode all trees<br>76. MeSH descriptor: [Hospitals, Pediatric] explode all trees<br>77. MeSH descriptor: [Intensive Care Units, Neonatal] explode all trees<br>78. MeSH descriptor: [Intensive Care Units, Pediatric] explode all trees<br>79. Infant:ti,ab,kw (Word variations have been searched)<br>80. Infants:ti,ab,kw (Word variations have been searched)<br>81. Newborn:ti,ab,kw (Word variations have been searched)<br>82. Newborns:ti,ab,kw (Word variations have been searched)<br>83. Baby:ti,ab,kw (Word variations have been searched)<br>84. Babies:ti,ab,kw (Word variations have been searched)<br>85. Natal:ti,ab,kw (Word variations have been searched)<br>86. Neonatal:ti,ab,kw (Word variations have been searched)<br>87. Infancy:ti,ab,kw (Word variations have been searched)<br>88. Preterm:ti,ab,kw (Word variations have been searched)<br>89. Premature:ti,ab,kw (Word variations have been searched)<br>90. Postpremature:ti,ab,kw (Word variations have been searched)<br>91. Child:ti,ab,kw (Word variations have been searched)<br>92. Children:ti,ab,kw (Word variations have been searched) | 74. (MH "Physical Therapists")<br>75. (MH "Physical Therapy+")<br>76. "motor intervention"<br>77. (MH "Motor Skills+")<br>78. (MH "Recreational Therapy")<br>79. (MH "Hydrotherapy+")<br>80. (MH "Equine-Assisted Therapy")<br>81. (MH "Weight Lifting")<br>82. (MH "Wrestling")<br>83. (MH "Track and Field")<br>84. (MH "Soccer")<br>85. (MH "Skiing+")<br>86. (MH "Winter Sports+")<br>87. (MH "Skating+")<br>88. (MH "Tennis")<br>89. (MH "Racquet Sports+") | 76. TOPIC: (Preadolescence)<br>77. TOPIC: (Preadolescent)<br>78. TOPIC: (Adolescence)<br>79. TOPIC: (Adolescent)<br>80. TOPIC: (Child)<br>81. TOPIC: (Postpremature)<br>82. TOPIC: (Premature)<br>83. TOPIC: (Preterm)<br>84. TOPIC: (Infancy)<br>85. TOPIC: (Neonatal)<br>86. TOPIC: (Natal)<br>87. TOPIC: (Babies)<br>88. TOPIC: (Baby)<br>89. TOPIC: (Newborn)<br>90. TOPIC: (Infant)<br>91. <b>64-90/OR</b><br>92. <b>3 AND 63 AND 91</b> |                                          |                             |

**Appendix**  
**Table S1: Search Strategies by Database**

| PubMed<br>(searched 4/30/19)                                                                                                                                                                                                                                                                           | Cochrane Library<br>(Wiley; searched 4/30/19)                                                                                                                                                                                                                                                                                                                                                                                                                                                                                                                                                                                                                                                                                                                                                                                                                                                                                                                                                                                                                                                                                                                                                      | CINAHL Complete<br>(EBSCO; searched 4/30/19)                                                                                                                                                                                                                                                                                                                                                                                                                                                                                | Web of Knowledge<br>(Clarivate Analytics;<br>All Databases;<br>searched 4/30/19) | ClinicalTrials.gov<br>(searched 4/30/19) | PEDro<br>(searched 4/30/19) |
|--------------------------------------------------------------------------------------------------------------------------------------------------------------------------------------------------------------------------------------------------------------------------------------------------------|----------------------------------------------------------------------------------------------------------------------------------------------------------------------------------------------------------------------------------------------------------------------------------------------------------------------------------------------------------------------------------------------------------------------------------------------------------------------------------------------------------------------------------------------------------------------------------------------------------------------------------------------------------------------------------------------------------------------------------------------------------------------------------------------------------------------------------------------------------------------------------------------------------------------------------------------------------------------------------------------------------------------------------------------------------------------------------------------------------------------------------------------------------------------------------------------------|-----------------------------------------------------------------------------------------------------------------------------------------------------------------------------------------------------------------------------------------------------------------------------------------------------------------------------------------------------------------------------------------------------------------------------------------------------------------------------------------------------------------------------|----------------------------------------------------------------------------------|------------------------------------------|-----------------------------|
| 109. Preeteen<br>110. Preteens<br>111. Youth<br>112. Youths<br>113. Minor<br>114. Minors<br>115. Pediatrics<br>116. Pediatric<br>117. Neonatology<br>118. Perinatology<br>119. Toddler<br>120. Toddlers<br>121. Girl<br>122. girls<br>123. Boy<br>124. Boys<br>125. 72-124/OR<br>126. 5 AND 71 AND 125 | 93. Childhood:ti,ab,kw (Word variations have been searched)<br>94. Adolescent:ti,ab,kw (Word variations have been searched)<br>95. Adolescents:ti,ab,kw (Word variations have been searched)<br>96. Adolescence:ti,ab,kw (Word variations have been searched)<br>97. Teen:ti,ab,kw (Word variations have been searched)<br>98. Teens:ti,ab,kw (Word variations have been searched)<br>99. Teenager:ti,ab,kw (Word variations have been searched)<br>100. Teenagers:ti,ab,kw (Word variations have been searched)<br>101. Preadolescent:ti,ab,kw (Word variations have been searched)<br>102. Preadolescents:ti,ab,kw (Word variations have been searched)<br>103. Preadolescence:ti,ab,kw (Word variations have been searched)<br>104. pubertal:ti,ab,kw (Word variations have been searched)<br>105. Prepubescent:ti,ab,kw (Word variations have been searched)<br>106. Prepubescents:ti,ab,kw (Word variations have been searched)<br>107. Prepubescence:ti,ab,kw (Word variations have been searched)<br>108. Preeteen:ti,ab,kw (Word variations have been searched)<br>109. Preteens:ti,ab,kw (Word variations have been searched)<br>110. Youth:ti,ab,kw (Word variations have been searched) | 90. (MH "Mountaineering")<br>91. (MH "Tai Chi")<br>92. (MH "Martial Arts")<br>93. (MH "Hockey")<br>94. (MH "Gymnastics")<br>95. (MH "Golf")<br>96. (MH "Football")<br>97. (MH "Boxing")<br>98. (MH "Cycling")<br>99. (MH "Basketball")<br>100. (MH "Baseball")<br>101. (MH "Physical Endurance+")<br>102. (MH "Athletic Performance")<br>103. (MH "Physical Fitness+")<br>104. (MH "Balance, Postural")<br>105. <b>43-104/OR</b><br>106. autistic<br>107. autism<br>108. (MH "Autistic Disorder")<br>109. <b>106-108/OR</b> |                                                                                  |                                          |                             |

**Appendix**  
**Table S1: Search Strategies by Database**

| PubMed<br>(searched 4/30/19) | Cochrane Library<br>(Wiley; searched 4/30/19)                                                                                                                                                                                                                                                                                                                                                                                                                                                                                                                                                                                                                                                                                                                                                                                                                                              | CINAHL Complete<br>(EBSCO; searched 4/30/19) | Web of Knowledge<br>(Clarivate Analytics;<br>All Databases;<br>searched 4/30/19) | ClinicalTrials.gov<br>(searched 4/30/19) | PEDro<br>(searched 4/30/19) |
|------------------------------|--------------------------------------------------------------------------------------------------------------------------------------------------------------------------------------------------------------------------------------------------------------------------------------------------------------------------------------------------------------------------------------------------------------------------------------------------------------------------------------------------------------------------------------------------------------------------------------------------------------------------------------------------------------------------------------------------------------------------------------------------------------------------------------------------------------------------------------------------------------------------------------------|----------------------------------------------|----------------------------------------------------------------------------------|------------------------------------------|-----------------------------|
|                              | 111. Youths:ti,ab,kw (Word variations have been searched)<br>112. Minor:ti,ab,kw (Word variations have been searched)<br>113. Minors:ti,ab,kw (Word variations have been searched)<br>114. Pediatrics:ti,ab,kw (Word variations have been searched)<br>115. Pediatric:ti,ab,kw (Word variations have been searched)<br>116. Neonatology:ti,ab,kw (Word variations have been searched)<br>117. Perinatology:ti,ab,kw (Word variations have been searched)<br>118. Toddler:ti,ab,kw (Word variations have been searched)<br>119. Toddlers:ti,ab,kw (Word variations have been searched)<br>120. Girl:ti,ab,kw (Word variations have been searched)<br>121. girls:ti,ab,kw (Word variations have been searched)<br>122. Boy:ti,ab,kw (Word variations have been searched)<br>123. Boys:ti,ab,kw (Word variations have been searched)<br>124. <b>71-123/OR</b><br>125. <b>5 and 70 and 124</b> | 110. <b>42 AND 105<br/>AND 109</b>           |                                                                                  |                                          |                             |
